# Supplementary material
Source: PubMed Central journal article supplement (PMC8906024)
Supplement: mmc1.pdf [file mmc1.pdf]

|                                                                                     |                                                                           |                                                                                |                                                                                                                                               |
|-------------------------------------------------------------------------------------|---------------------------------------------------------------------------|--------------------------------------------------------------------------------|-----------------------------------------------------------------------------------------------------------------------------------------------|
| EPI_ISL_2839334, EPI_ISL_2839368, EPI_ISL_2839374                                   | Centre for Infectious Diseases and Microbiology Laboratory Services       | Centre for Infectious Diseases and Microbiology Laboratory Services            | "John-Sebastian Eden, Jen Kok, Dominic Dwyer, Edward Holmes, Philip Britton, Alison Kesson, Elena Cutmore, Rachel Tulloch, Bethany Horsburgh" |
| EPI_ISL_2839376                                                                     | PathWest Laboratory Medicine WA Microbial Surveillance Unit               | PathWest Laboratory Medicine WA Microbial Surveillance Unit                    | "Chisha Sikazwe, Avram Levy, David Smith, Chris Blyth, Alice Michie, Cara Minney-Smith, David Speers"                                         |
| EPI_ISL_2839394                                                                     | Centre for Infectious Diseases and Microbiology Laboratory Services       | Centre for Infectious Diseases and Microbiology Laboratory Services            | "John-Sebastian Eden, Jen Kok, Dominic Dwyer, Edward Holmes, Philip Britton, Alison Kesson, Elena Cutmore, Rachel Tulloch, Bethany Horsburgh" |
| EPI_ISL_2839407                                                                     | PathWest Laboratory Medicine WA Microbial Surveillance Unit               | PathWest Laboratory Medicine WA Microbial Surveillance Unit                    | "Chisha Sikazwe, Avram Levy, David Smith, Chris Blyth, Alice Michie, Cara Minney-Smith, David Speers"                                         |
| EPI_ISL_2839417                                                                     | Centre for Infectious Diseases and Microbiology Laboratory Services       | Centre for Infectious Diseases and Microbiology Laboratory Services            | "John-Sebastian Eden, Jen Kok, Dominic Dwyer, Edward Holmes, Philip Britton, Alison Kesson, Elena Cutmore, Rachel Tulloch, Bethany Horsburgh" |
| EPI_ISL_2839433                                                                     | PathWest Laboratory Medicine WA Microbial Surveillance Unit               | PathWest Laboratory Medicine WA Microbial Surveillance Unit                    | "Chisha Sikazwe, Avram Levy, David Smith, Chris Blyth, Alice Michie, Cara Minney-Smith, David Speers"                                         |
| EPI_ISL_2839434                                                                     | Departments of Clinical Microbiology and Infectious Diseases              | Centre for Infectious Diseases and Microbiology Laboratory Services            | "John-Sebastian Eden, Jen Kok, Dominic Dwyer, Edward Holmes, Philip Britton, Alison Kesson, Elena Cutmore, Rachel Tulloch, Bethany Horsburgh" |
| EPI_ISL_2839435, EPI_ISL_2839436, EPI_ISL_2839437, EPI_ISL_2839452                  | Centre for Infectious Diseases and Microbiology Laboratory Services       | Centre for Infectious Diseases and Microbiology Laboratory Services            | "John-Sebastian Eden, Jen Kok, Dominic Dwyer, Edward Holmes, Philip Britton, Alison Kesson, Elena Cutmore, Rachel Tulloch, Bethany Horsburgh" |
| EPI_ISL_2839453                                                                     | PathWest Laboratory Medicine WA Microbial Surveillance Unit               | PathWest Laboratory Medicine WA Microbial Surveillance Unit                    | "Chisha Sikazwe, Avram Levy, David Smith, Chris Blyth, Alice Michie, Cara Minney-Smith, David Speers"                                         |
| EPI_ISL_2839455, EPI_ISL_2839456                                                    | Departments of Clinical Microbiology and Infectious Diseases              | Centre for Infectious Diseases and Microbiology Laboratory Services            | "John-Sebastian Eden, Jen Kok, Dominic Dwyer, Edward Holmes, Philip Britton, Alison Kesson, Elena Cutmore, Rachel Tulloch, Bethany Horsburgh" |
| EPI_ISL_2839457                                                                     | Centre for Infectious Diseases and Microbiology Laboratory Services       | Centre for Infectious Diseases and Microbiology Laboratory Services            | "John-Sebastian Eden, Jen Kok, Dominic Dwyer, Edward Holmes, Philip Britton, Alison Kesson, Elena Cutmore, Rachel Tulloch, Bethany Horsburgh" |
| EPI_ISL_2896251, EPI_ISL_2896252, EPI_ISL_2896253, EPI_ISL_2896254, EPI_ISL_2896255 | NIC, National Institute of Health                                         | WHO Collaborating Centre for Reference and Research on Influenza               | Xiaomin Dong, Pilailuk Akkapaiboon Okada, Yi-Mo Deng, Ammar Aziz, Naomi Komadina                                                              |
| EPI_ISL_2989828                                                                     | Royal Children's Hospital                                                 | WHO Collaborating Centre for Reference and Research on Influenza               | Xiaomin Dong, Annette Alafaci, Yi-Mo Deng, Ammar Aziz, Naomi Komadina                                                                         |
| EPI_ISL_413935, EPI_ISL_413936, EPI_ISL_413942                                      | WHO National Influenza Centre Russian Federation                          | WHO National Influenza Centre Russian Federation                               | Komissarova K., Fadeev A., Komissarov A., Krivitskaya V.                                                                                      |
| EPI_ISL_4204345                                                                     | Sub Departamento Genetica Molecular                                       | Instituto de Salud Publica de Chile Seccion Genetica Molecular                 | Jorge Fernandez                                                                                                                               |
| EPI_ISL_549280, EPI_ISL_549299                                                      | LACEN/ES                                                                  | Laboratory of Respiratory Viruses and Measles, Oswaldo Cruz Institute, FIOCRUZ | Lucas Vianna, Lays Volpini, Marilda Siqueira, Iuri Louro, Paola Resende                                                                       |
| EPI_ISL_732370, EPI_ISL_732372                                                      | Respiratory Virus Unit, National Infection Service, Public Health England | National Infection Service, Public Health England                              | Zambon M, Talts T, Ellis J, Miah S, Platt S                                                                                                   |
